# Supplementary figures and images for: A survey on predicting the popularity of web content
Source: Springer Nature journal article supplement (doi:10.1186/s13174-014-0008-y), 2014-08-12

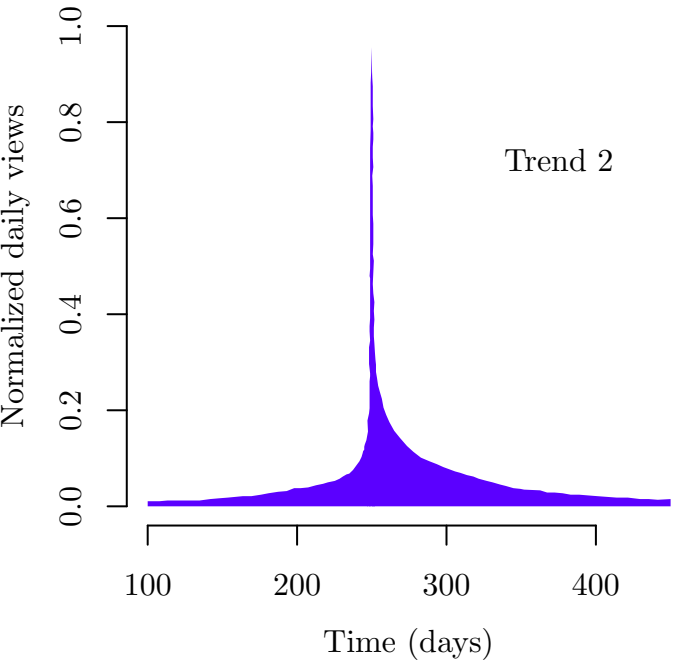

Supplement: MOESM4 [file 10784780]

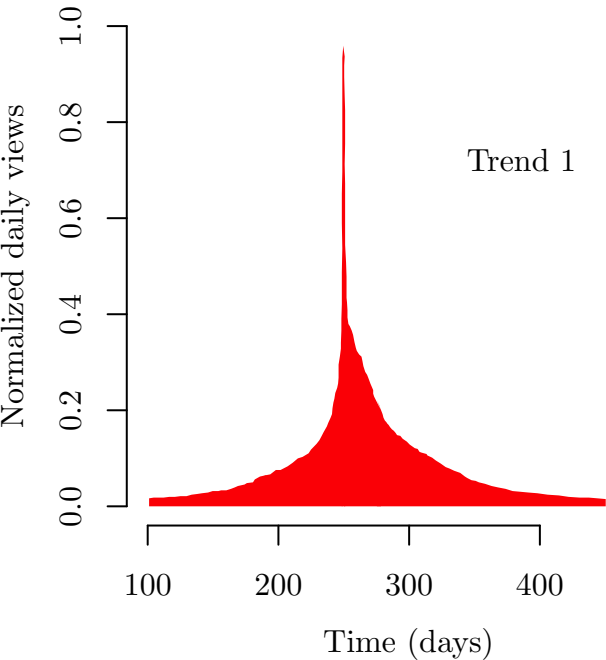

Supplement: MOESM5 [file 10784780]
